# Supplementary material
Source: PubMed Central journal article supplement (PMC3811359)
Supplement: AEM.02197-13_zam999104757so1.pdf [file AEM.02197-13_zam999104757so1.pdf]

**Supplementary material to  
Biosynthesis of disaccharide-modified polyene macrolides  
De Poire, E., Stephens, N., Rawlings, B., Caffrey, P. 2013**

**Fig. S1** MS detection of amphotericin A from *S. nodosus* pLAGO.

**Fig. S2** MS detection of amphotericin B from *S. nodosus* pLAGO.

**Fig. S3** MS detection of mannosyl amphotericin A from *S. nodosus* pLAGO-*nypY*.

**Fig. S4** MS detection of mannosyl amphotericin B from *S. nodosus* pLAGO-*nypY*.

**Fig. S5** HPLC analysis of heptaenes from *S. nodosus* KR16 containing pLAGO (A) and pLAGO-*nypY* (B).

**Fig. S6** MS detection of 7-oxo-amphotericin B from *S. nodosus* KR16 pLAGO.

**Fig. S7** MS detection of mannosyl-7-oxo-amphotericin B from *S. nodosus* KR16 pLAGO-*nypY*.

**Fig. S8** HPLC analysis of candicidins from *S. albidoflavus* containing (A) pLAGO, (B) pLAGO-*pegA1*, (C) pLAGO-*nypY*.

**Fig. S9** MS detection of candicidins from *S. albidoflavus* pLAGO.

**Fig. S10** MS detection of mannosyl-candicidins from *S. albidoflavus* pLAGO-*pegA1*.

**Fig. S11** MS detection of mannosyl-candicidins from *S. albidoflavus* pLAGO-*nypY*.

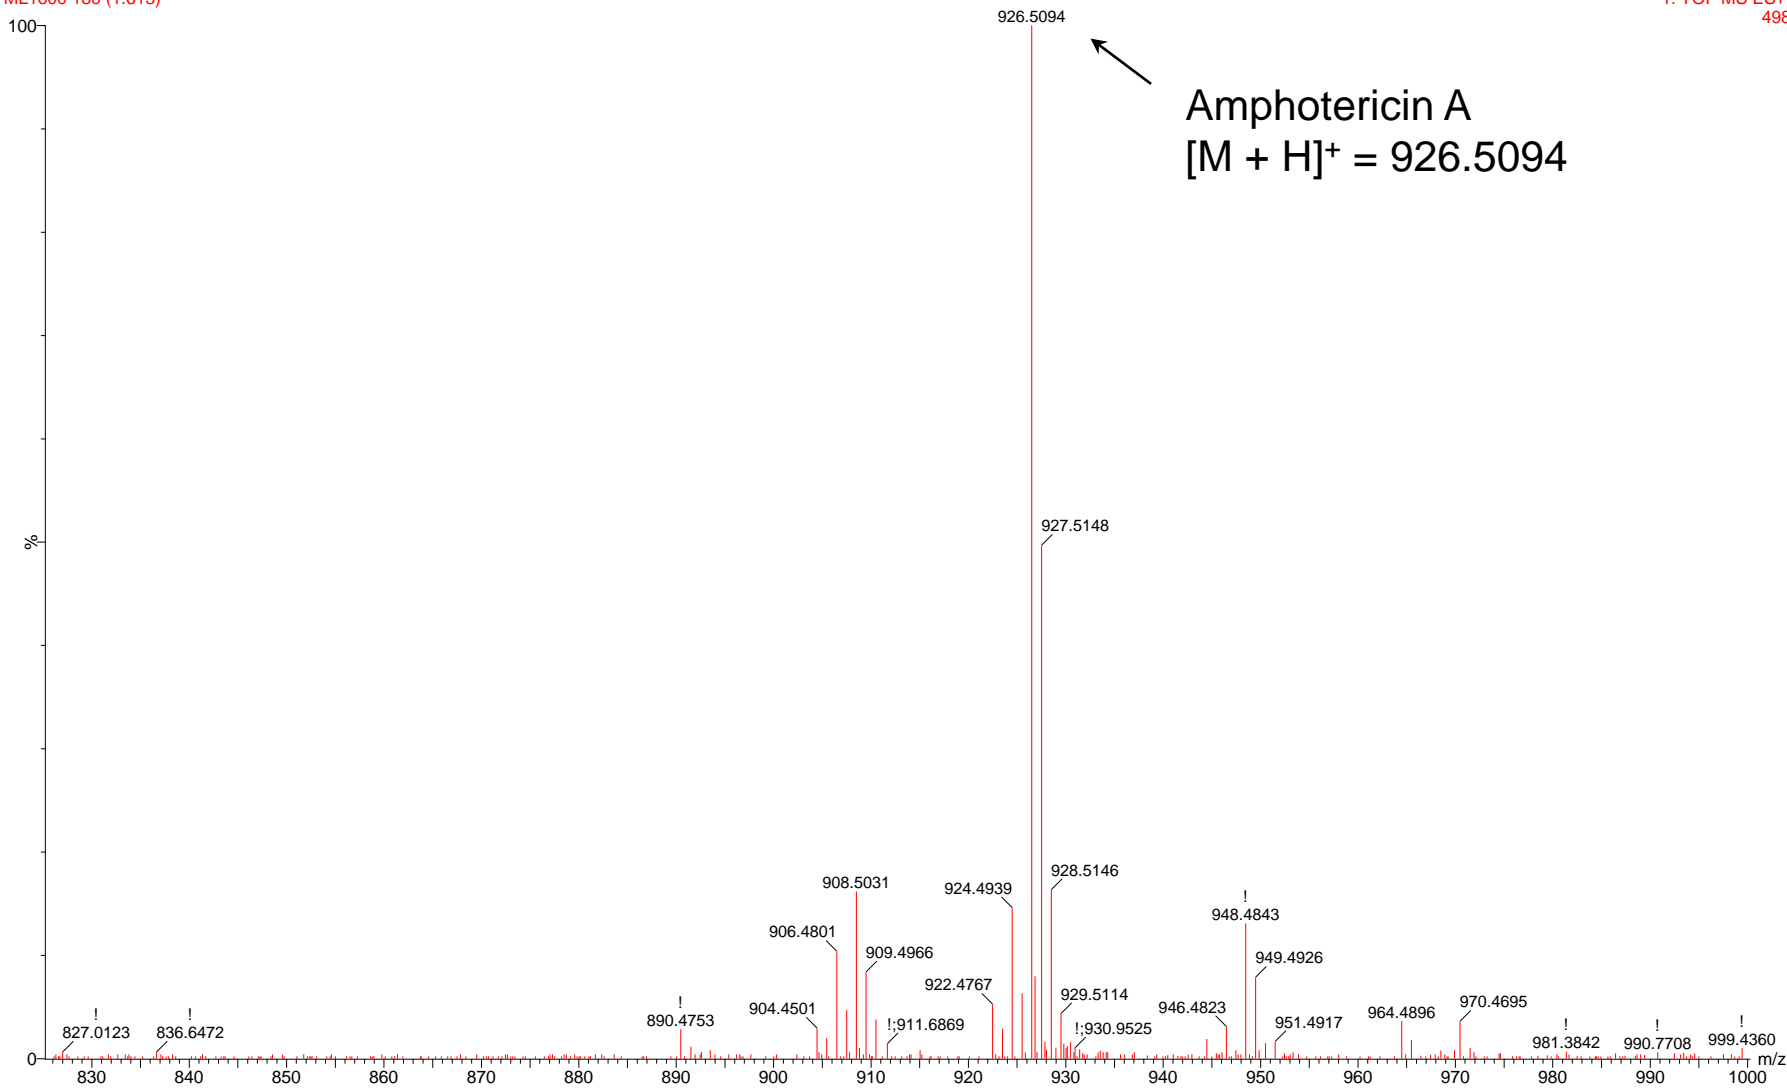

Amphotericin A  
[M + H]<sup>+</sup> = 926.5094

Fig. S1. MS detection of amphotericin A from *S. nodosus* pIAGO

MSXEVO130613UCD(1) pIAGO  
ML1600 184 (1.657) Cm (183:189-180)

1: TOF MS ES+  
2.66e4

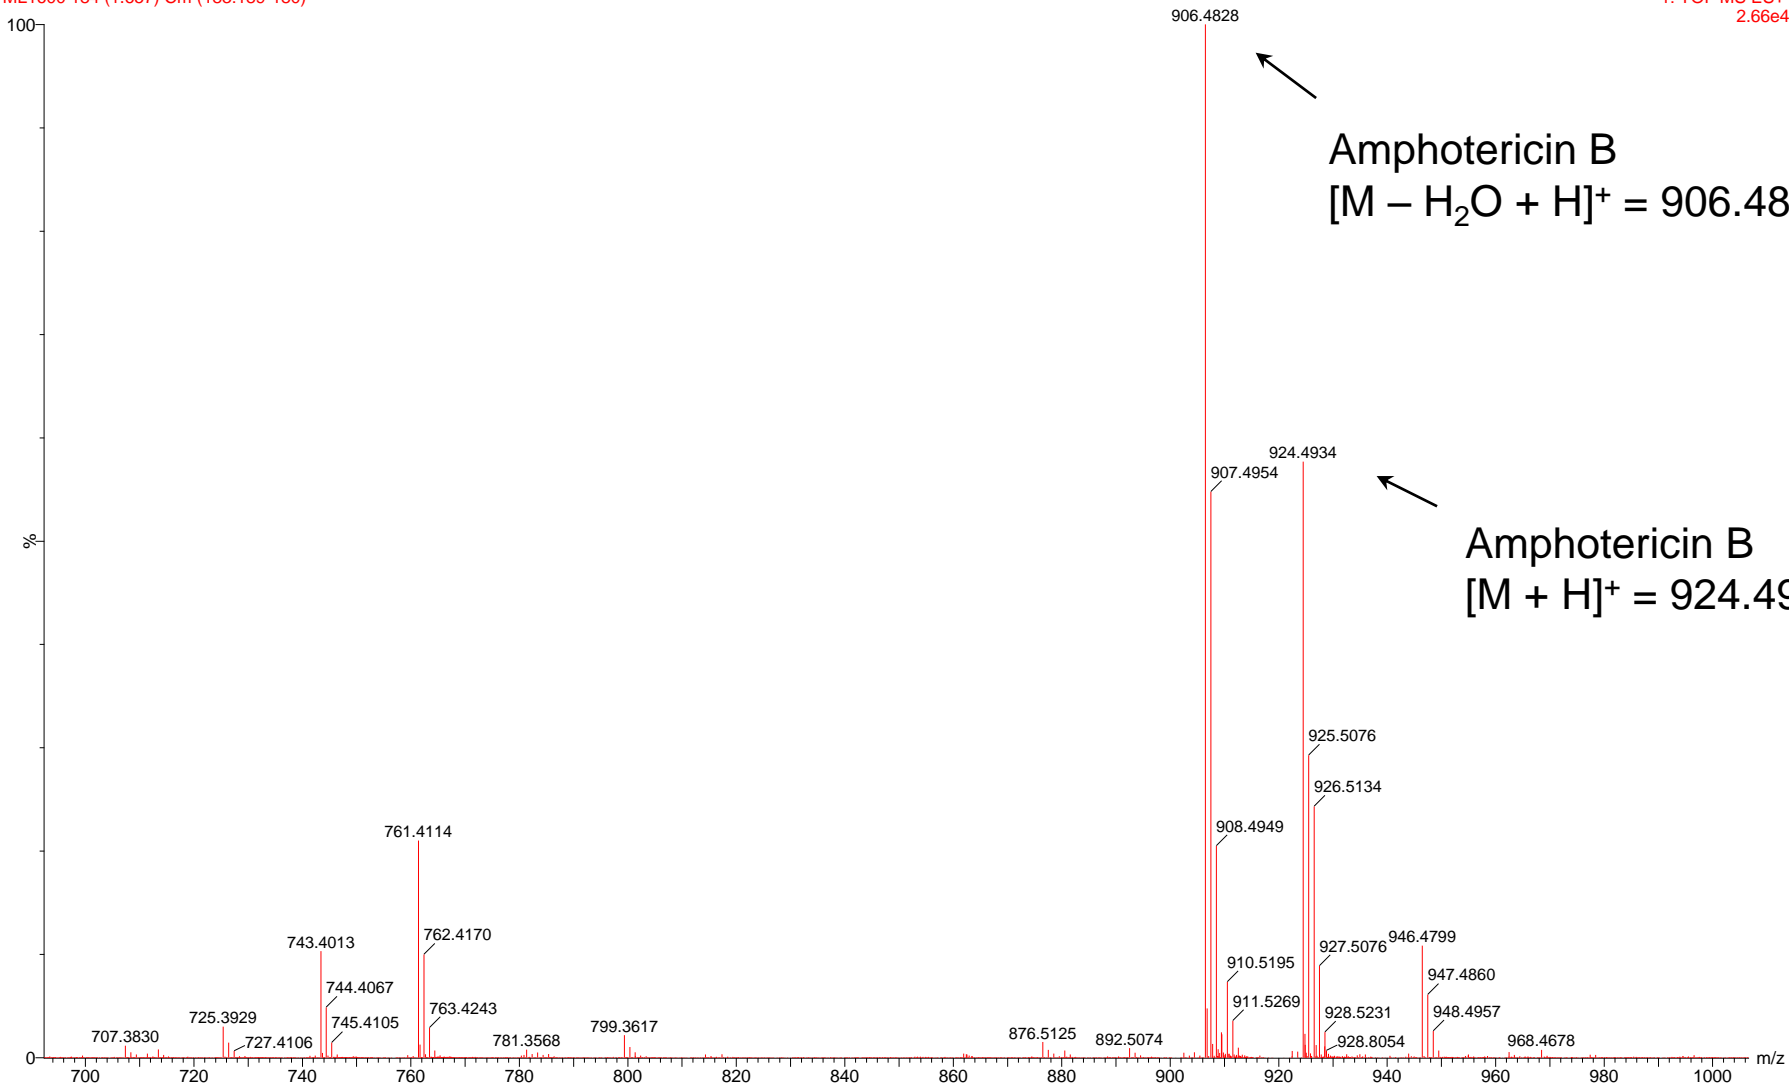

Amphotericin B  
 $[M - H_2O + H]^+ = 906.4828$

Amphotericin B  
 $[M + H]^+ = 924.4934$

Fig. S2. MS detection of amphotericin B from *S. nodosus* pIAGO

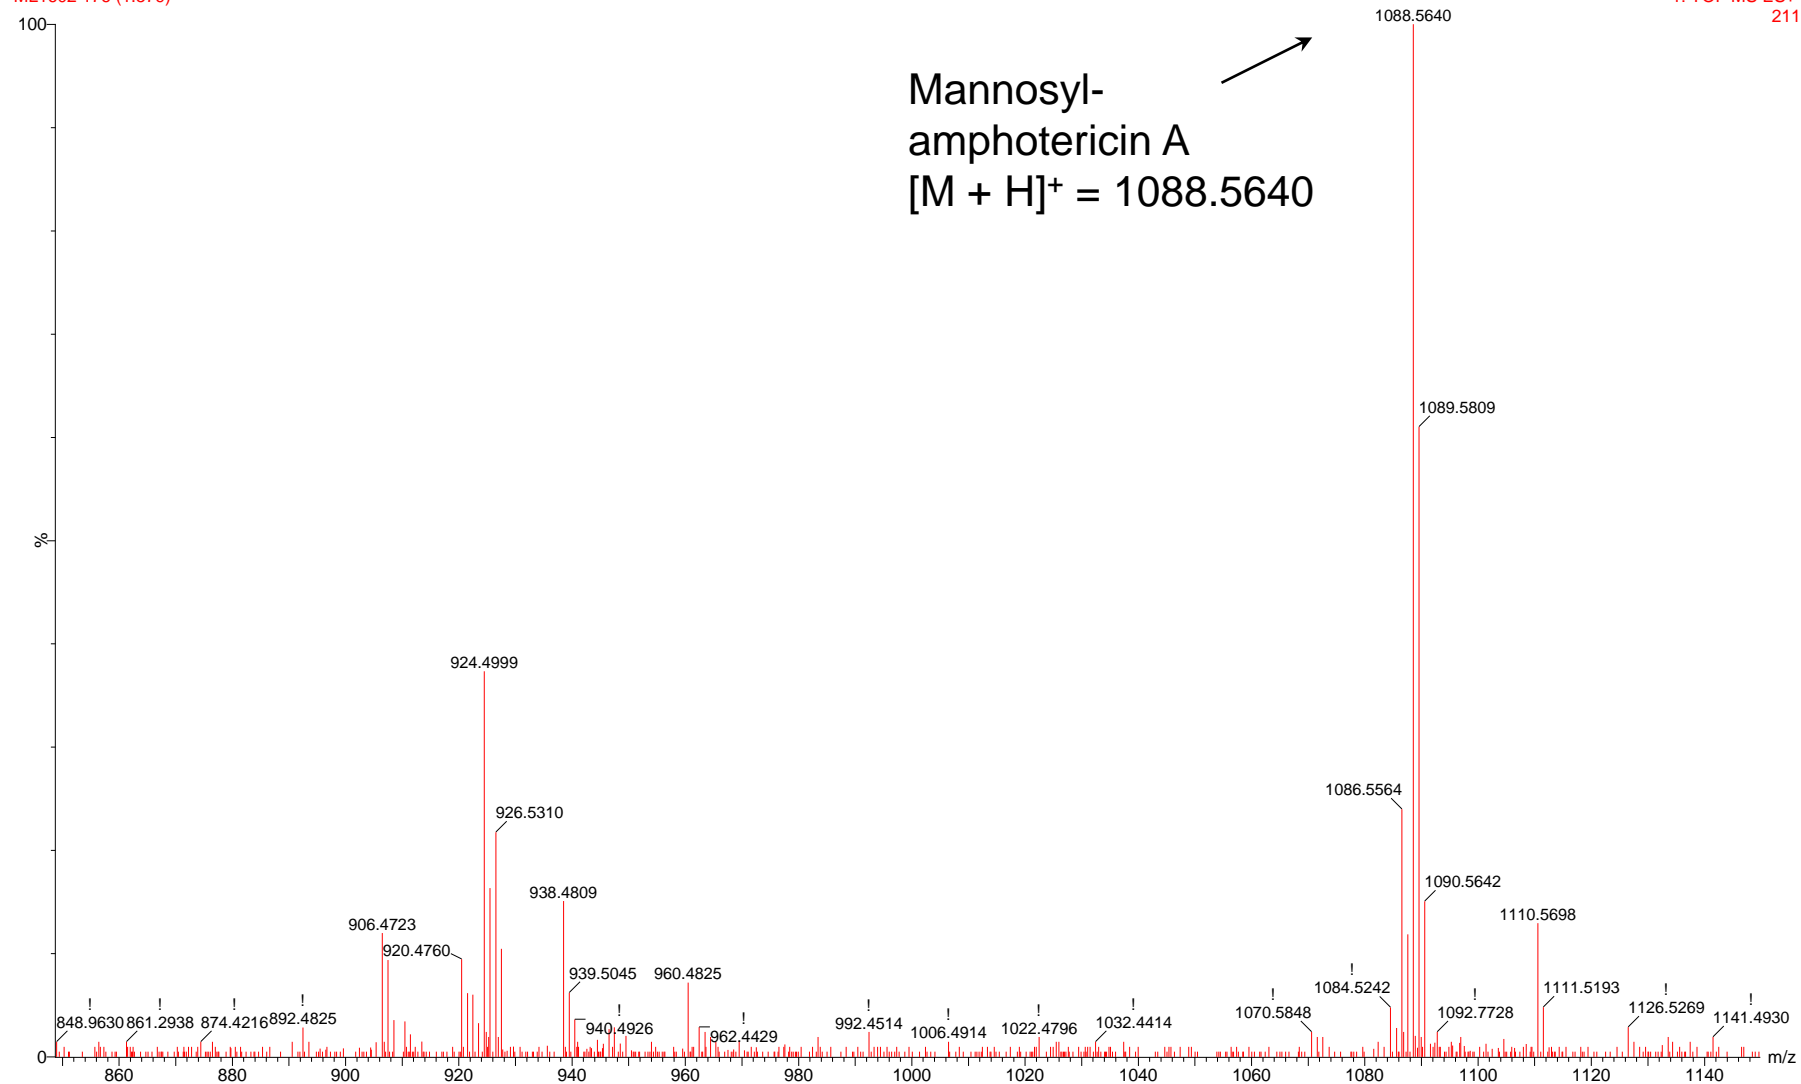

Fig. S3. MS detection of mannosyl-amphotericin A from *S. nodosus* pLAGO-nypY

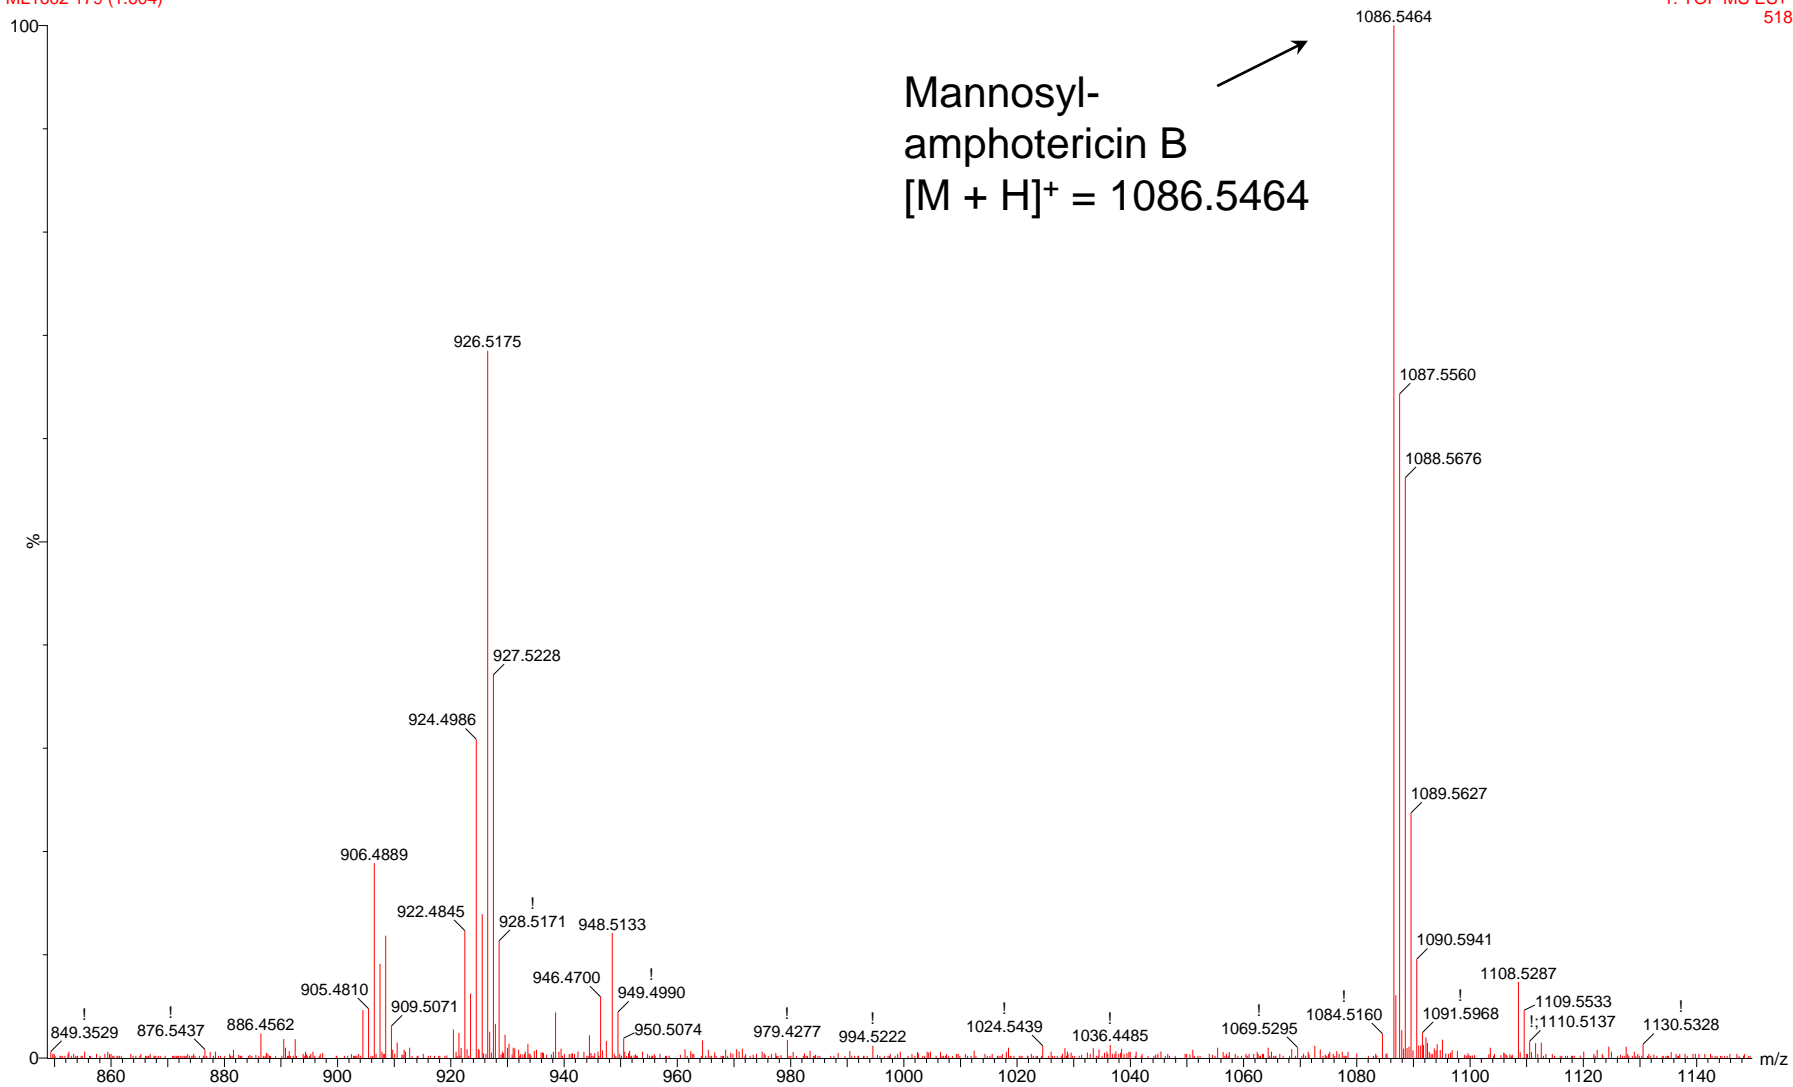

Fig. S4. MS detection of mannosyl-amphotericin B from *S. nodosus* pIAGO-*nypY*

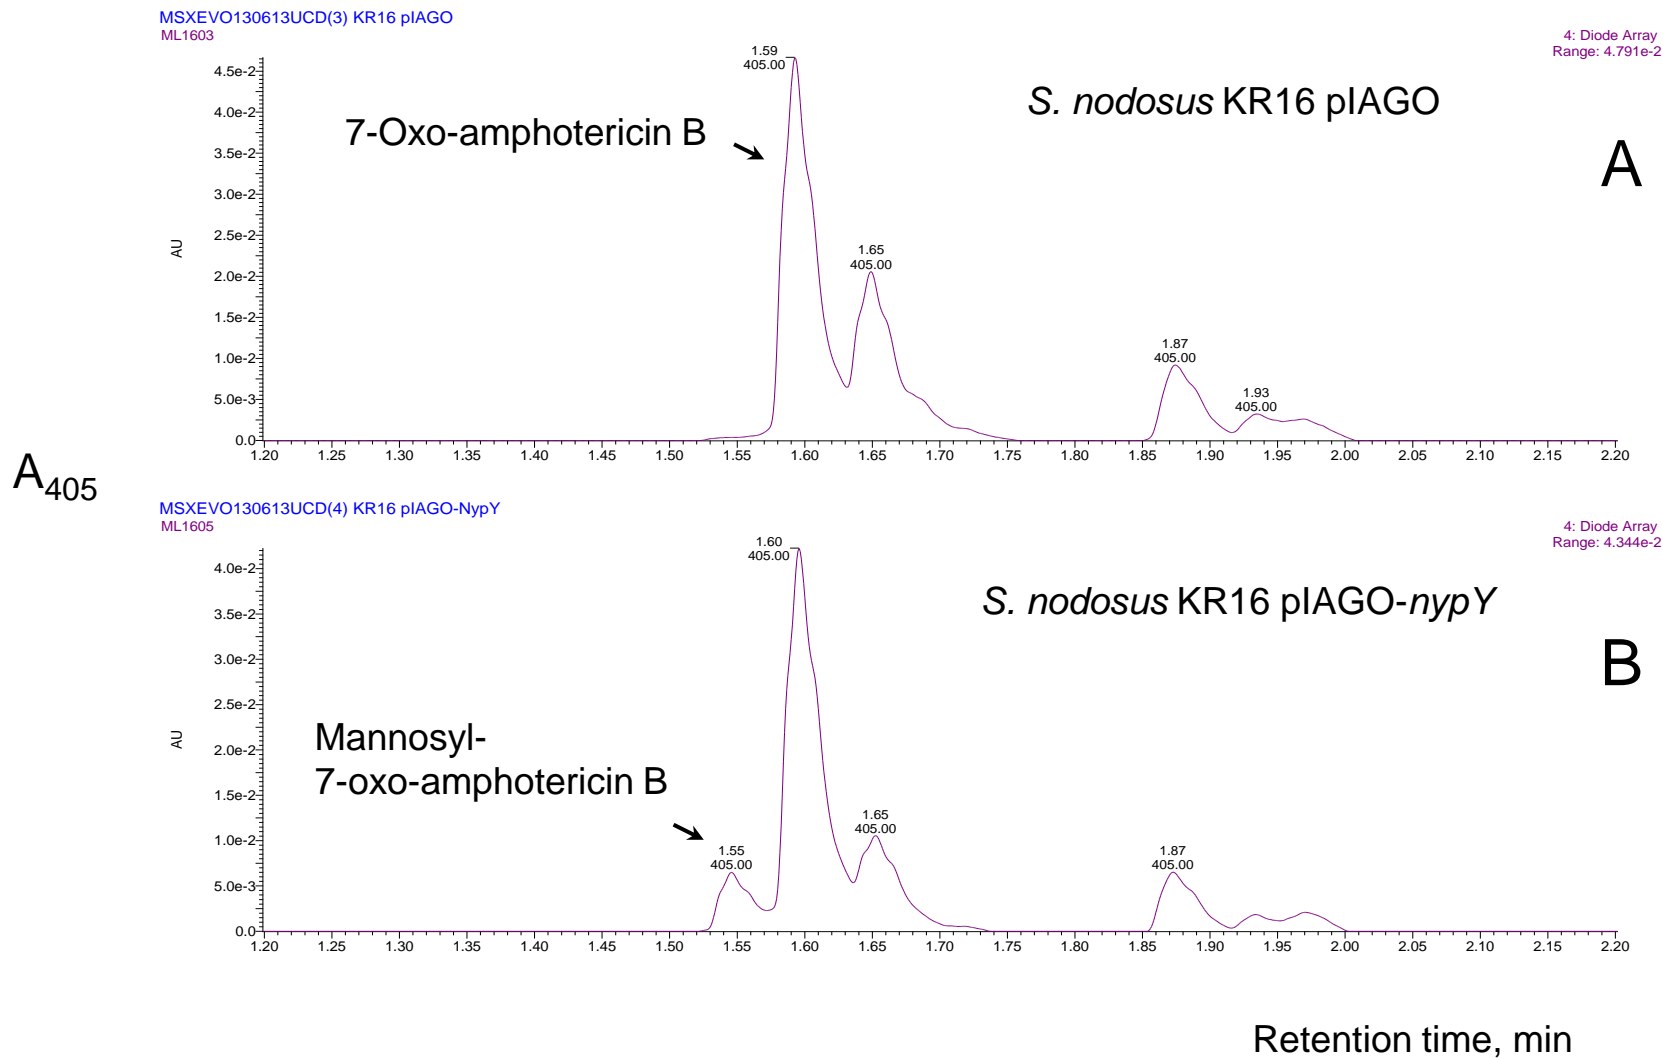

Fig. S5. HPLC analysis of heptaenes from *S. nodosus* KR16 containing pIAGO (A) and pIAGO-*nypY* (B).

MSXEVO130613UCD(3) KR16 pIAGO  
ML1604 178 (1.596) Cm (178:180)

1: TOF MS ES+  
1.12e3

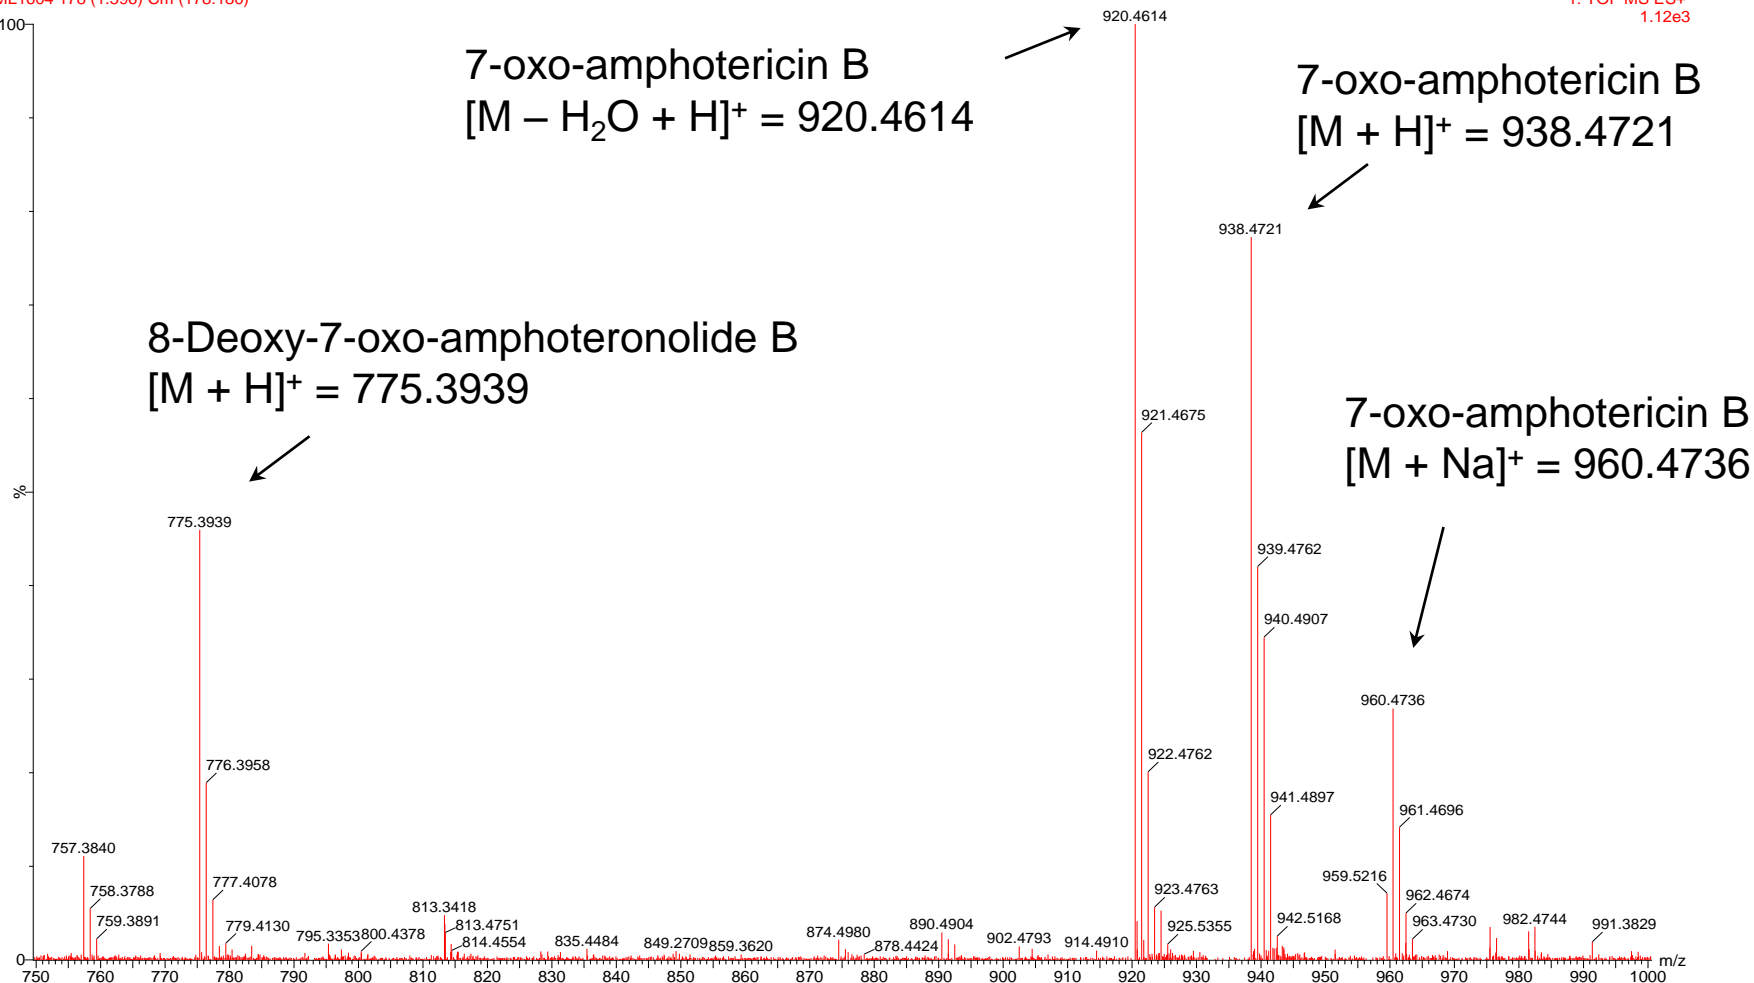

Fig. S6. MS detection of 7-oxoamphotericin B from *S. nodosus* KR16 pIAGO

Mannosyl-7-oxo-amphotericin B  
[M + H]<sup>+</sup> = 1100.5271

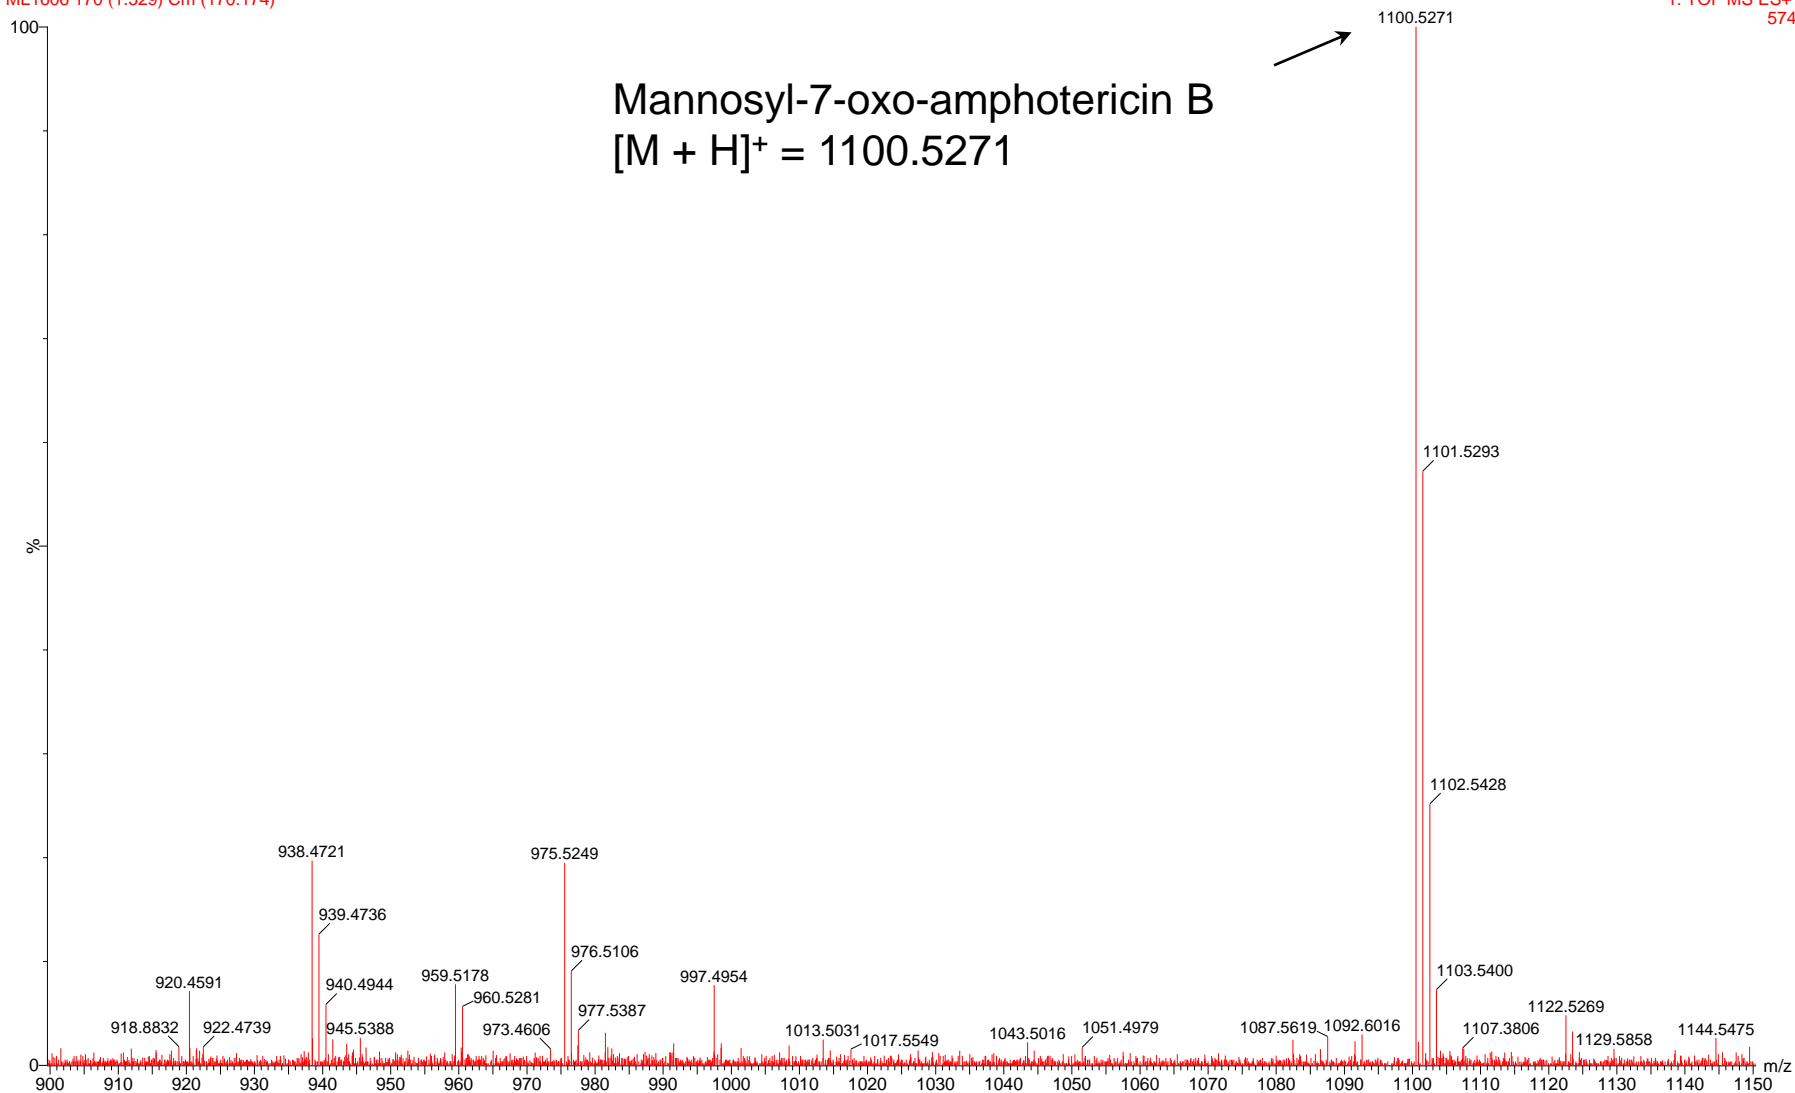

Fig. S7. MS detection of mannosyl-7-oxoamphotericin B from *S. nodosus* KR16 pIAGO-*nypY*.



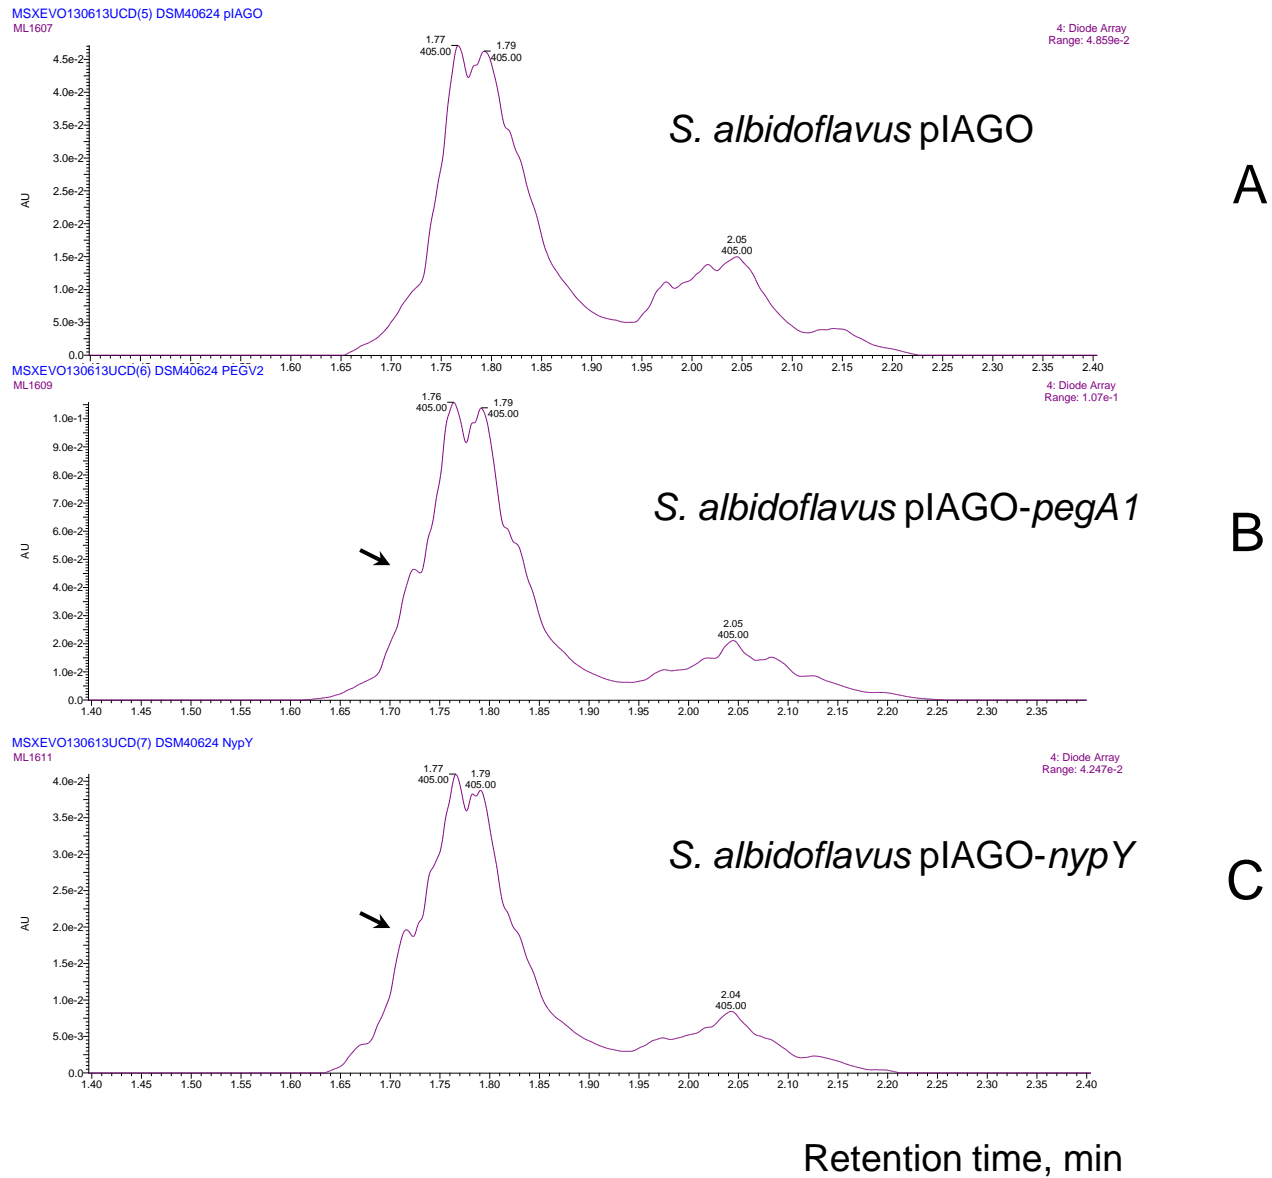

Fig. S8. HPLC analysis of candicidins from *S. albidoﬂavus* containing (A) pIAGO (B) pIAGO-*pegA1*, or (C) pIAGO-*nypY*.

MSXEVO130613UCD(5) DSM40624 pIAGO

ML1608 196 (1.757) Cm (194:197-200)

1: TOF MS ES+  
1.76e3

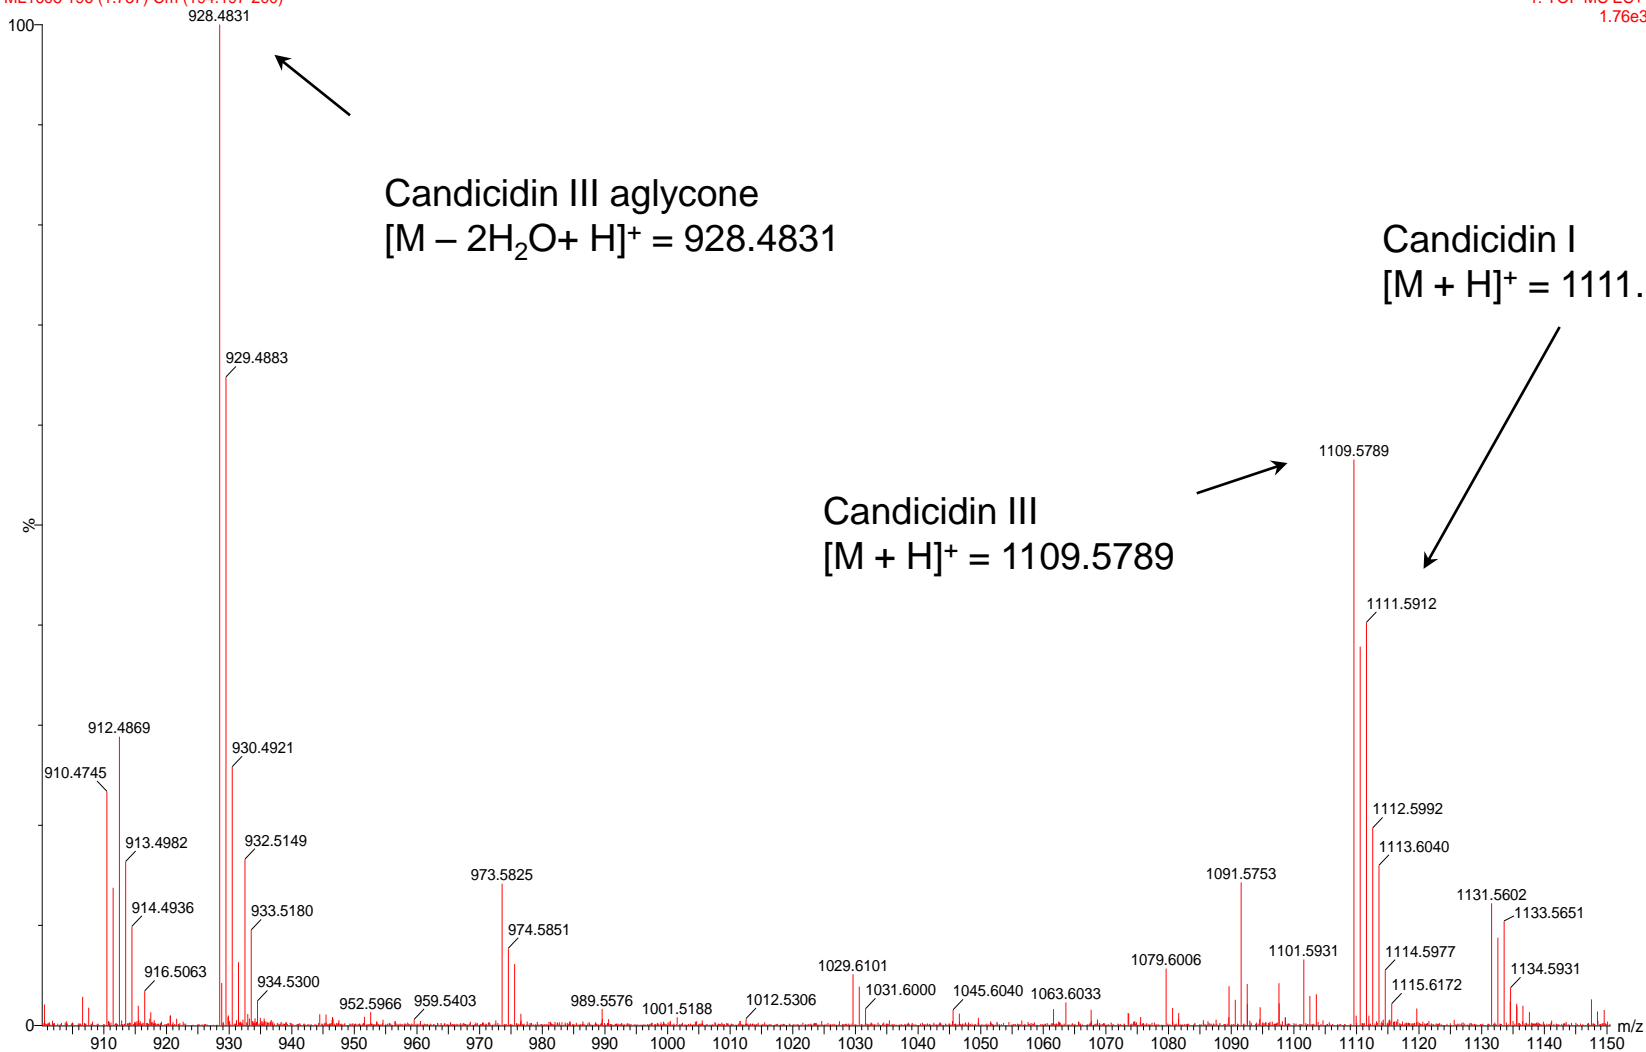

Fig. S9. MS detection of candicidins from *S. albidoflavus* pIAGO

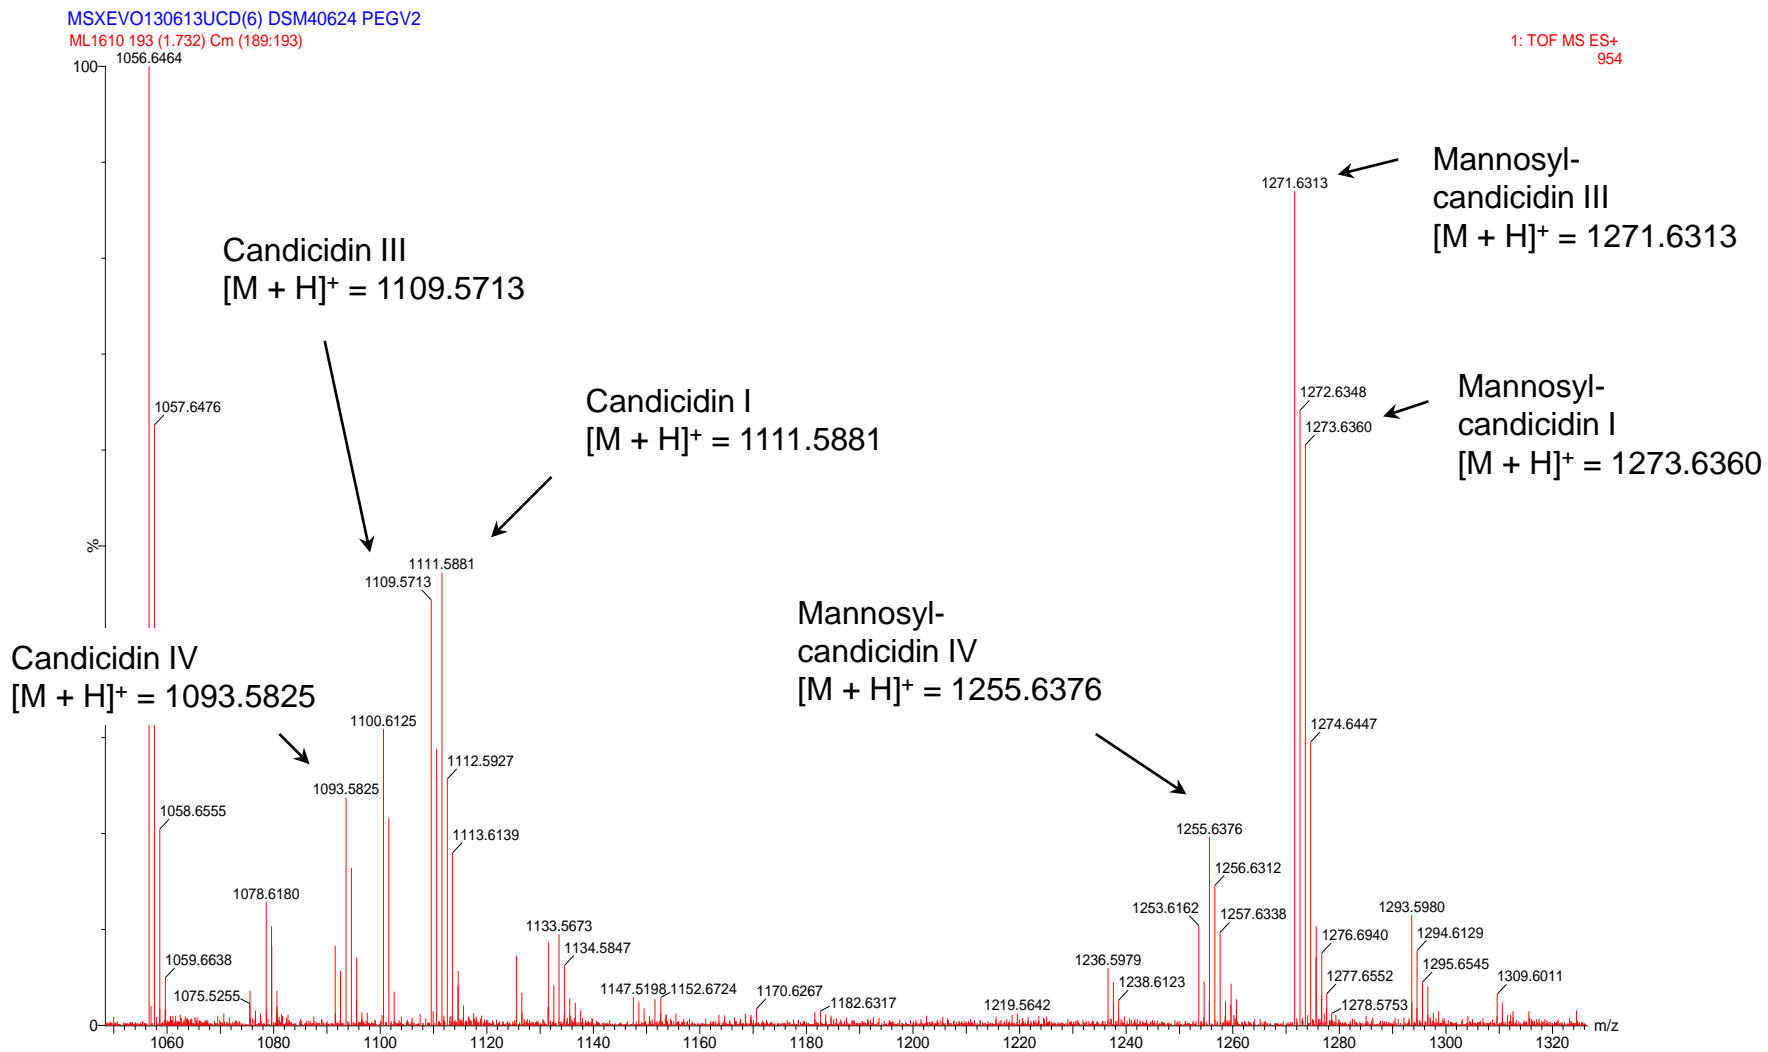

Fig. S10. MS detection of mannosyl-candicidins from *S. albidoflavus* pIAGO-pegA1

MSXEVO130613UCD(7) DSM40624 NypY  
ML1612 189 (1.699) Cm (187:189)

1: TOF MS ES+  
95.9

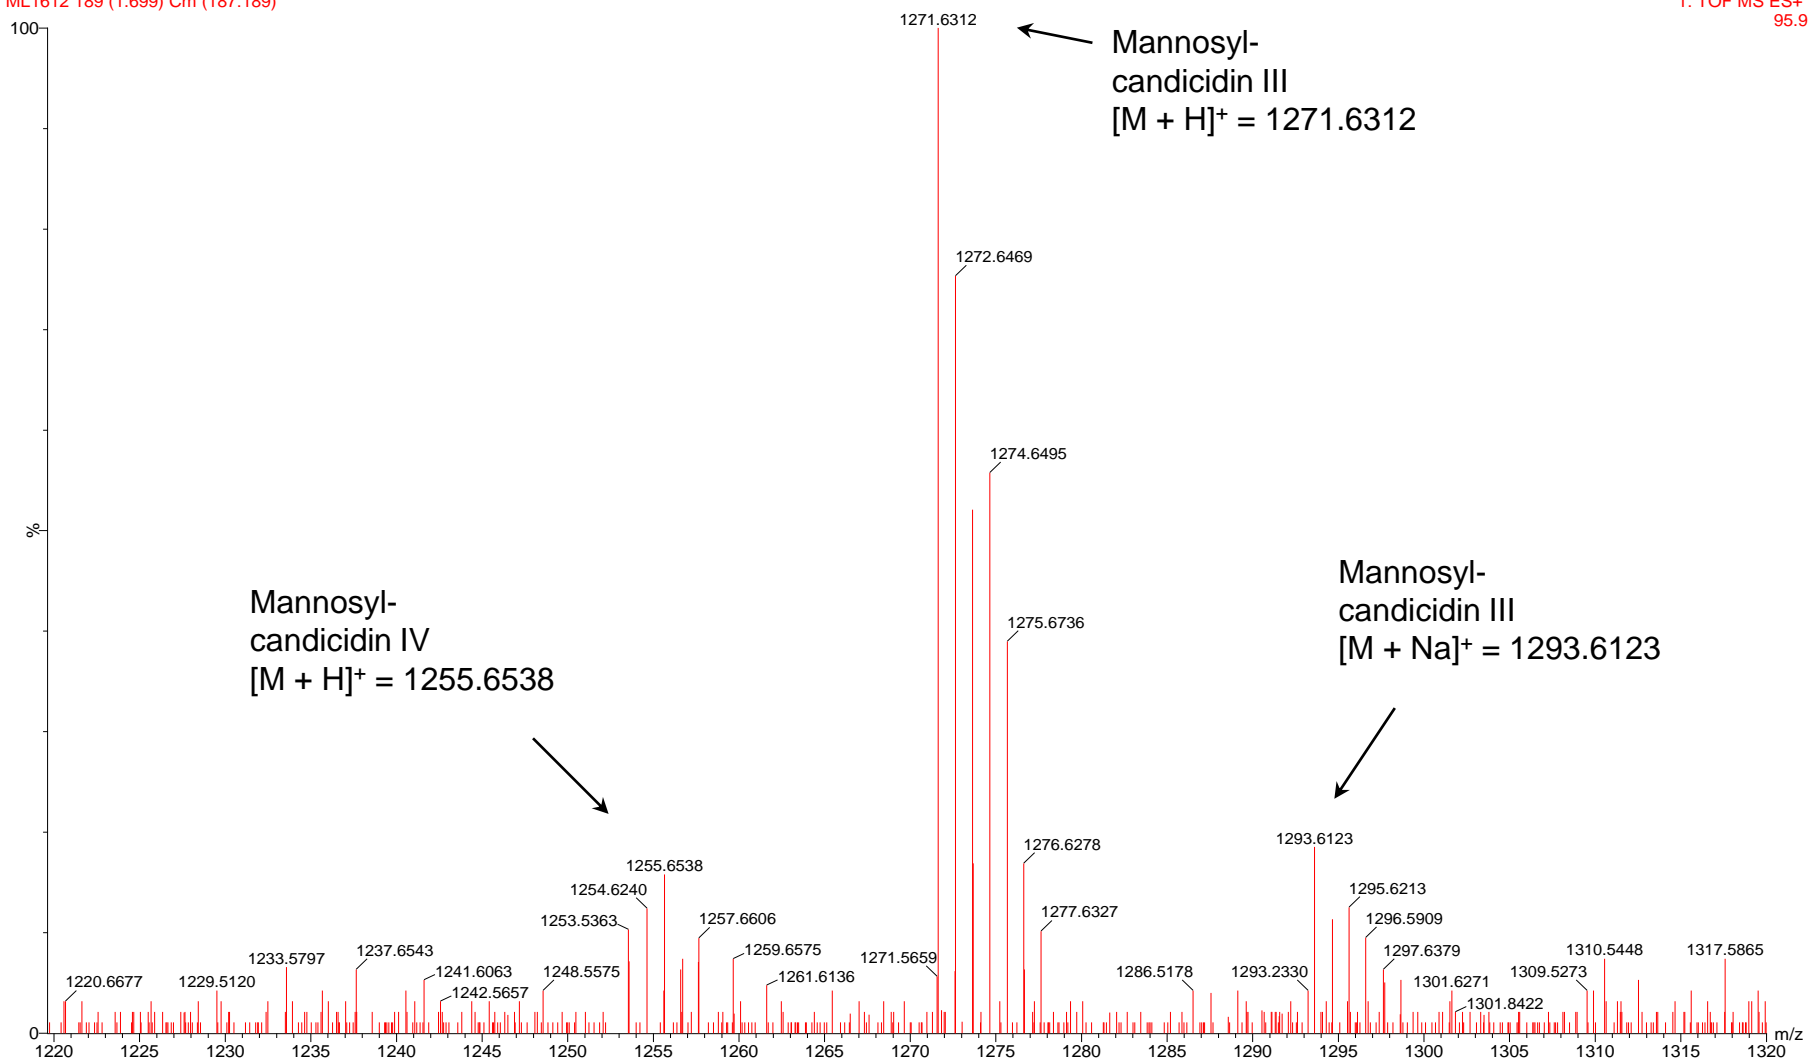

Fig. S11. MS detection of mannosyl-candicidins from *S. albidoflavus* pLAGO-*nypY*
